# Supplementary material for: Mycotoxins occurrence in dry herbs used for tea preparation: method validation, analysis of bulk samples and dietary risk assessment
Source: Research Square preprint supplement (doi:10.21203/rs.3.rs-8376617/v1), 2026-01-01
Supplement: Supplementary file 1 [file a38522195172f2850d96f65c.docx]

**SUPPLEMENTARY MATERIAL**

**Mycotoxins occurrence in dry herbs used for tea preparation: method validation, analysis of bulk samples and dietary risk assessment**

**Camila Suguiura Evangelista1, Denise Carvalho Mello1, Eloisa Dutra Caldas1, Patrícia Diniz Andrade1,2**

1Laboratory of Toxicology, Faculty of Health Sciences, University of Brasília, Brasilia, DF 70910-900, Brazil

2Faculty of Agronomy and Veterinary Medicine, University of Brasília, DF 70910-900, Brazil

**Table S1.** Number of samples collected in the Federal District between 2018 and 2021.

| **Sample (scientific name)** | **Plant part** | **Manufacture's recommendation (g)** | **N** | **Positive samples** | **Mycotoxin** | **Level**  **(µg/kg)** |
| --- | --- | --- | --- | --- | --- | --- |
| Angelica (*Angelica officinalis L.*) | Leaf | 2 - 20 | 2 | 1 | FB2 | 10.1 |
| OTA | Traces |
| ZEN | Traces |
| Arnica (*Arnica montana*) | Bark and leaf | 3 | 1 | < LOD |  |  |
| Arnica-do-mato (*Solidago microglossa*) | Leaf | 3 | 1 | < LOD |  |  |
| Artichoke (*Cynara scolymus*) | Leaf | 3 - 10 | 5 | 1 | FB2 | 2.9 |
| Assa-peixe (*Vernonia polysphaera*) | Leaf | 3 | 1 | < LOD |  |  |
| Barbatimão (*Stryphnodedron barbatiman*) | Bark | 3 | 1 | < LOD |  |  |
| Black mulberry (*Morus nigra*) | Leaf | 3 - 10 | 2 | 1 | ZEN | 52.0 |
| α-ZEL | Traces |
| Bladder wrack (*Fucus vesiculosus*) | Leaf | 9 - 12 | 3 | 1 | AFB2 | Traces |
| Boldo (*Boldus boldus*) | Leaf | 3 - 10 | 1 | < LOD |  |  |
| Boldo (Peumus boldus) | Leaf | 3 - 10 | 6 | < LOD |  |  |
| Canela de velho (*Miconia albicans*) | Leaf | NR | 2 | 1 | ZEN | Traces |
| Carqueja (*Baccharis trimera*) | Leaf | 10 | 1 | < LOD |  |  |
| Cáscara sagrada (*Rhamnus purshiana*) | Bark | 3 | 2 | < LOD |  |  |
| Cat’s claw. (*Uncaria tomentosa*) | Bark | 3 | 6 | 2 | AFB1 | 9.8 |
| AFB2 | Traces |
| FB2 | Traces |
| OTA | Traces – 10.0 |
| Chamomile (*Matricaria chamomilla*) | Flower | 3 - 10 | 1 | < LOD |  |  |
| Chamomile (*Matricaria recutita*) | Flower | 3 - 10 | 1 | 1 | ZEN | 6.6 |
| Chamomile (*Matricaria chamomilla*) | Flower and aerial part | 3 - 10 | 1 | < LOD |  |  |
| Chamomile (*Matricaria recutita*) | Flower, leaf and stem | 3 - 10 | 1 | < LOD |  |  |
| Chamomille (Matricaria recutita) | Leaf | 3 - 10 | 2 | 1 | ZEN | Traces |
| Chapéu de couro (*Echinodorus macrophyllus*) | Leaf | 3 | 3 | < LOD |  |  |
| Chlorella (*Chlorella pyrenoidosa*) | Algae | NR | 2 | < LOD |  |  |
| Comfrey (*Symphytum officinale*) | Leaf | 9 | 1 | 1 | ZEN | 8.3 |
| Espinheira santa (*Maytenus ilicifolia*) | Leaf | 10 | 5 | 1 | AFB1 | 7.8 |
| Ginkgo (*Ginkgo biloba*) | Leaf | 3 | 2 | 1 | FB2 | 4.7 |
| ZEN | 6.5 |
| Gotu kola (*Hydrocotyle asiatica*) | Leaf | 3 | 2 | 1 | FB2 | Traces |
| OTA | 11.6 |
| ZEN | 9.2 |
| Green tea (*Camelia sinensis*) | Leaf | 3 - 18 | 3 | 2 | AFG2 | 3.2 |
| ZEN | Traces |
| Green tea (*Camelia sinensis*) | Leaf andstalk | 3 - 18 | 1 | 1 | AFB2 | 47.1 |
| Guarana (*Paullinia cupana*) | Seed | 3 | 3 | 3 | FB2 | Traces – 2.2 |
| OTA | Traces |
| Hibiscus (*Hibiscus sabdariffa*) | Flower | 10 | 1 | 1 | FB2 | Traces |
| Hibiscus (*Rosa sinensis*) | Flower | 10 | 1 | < LOD |  |  |
| Horse chestnut (*Aesculus hippocastanum*) | Seed | 3 | 1 | 1 | AFB1 | 28.6 |
| FB2 | Traces |
| OTA | Traces |
| ZEN | Traces |
| Horsetail (*Equisetum arvense L*) | Aerial part | 3 - 10 | 2 | 2 | ZEN | 366.3-1955 |
| α-ZEL | 40.0 |
| Horsetail (*Equisetum hyemale*) | Leaf | 3 - 10 | 2 | 1 | ZEN | 867.2 |
| α-ZEL | 7.0 |
| Hoseradish tree (*Moringa oleifera*) | Leaf | 0.1 | 1 | 1 | AFG1 | 62.4 |
| Muira puama (*Ptychopetalum olacoides*) | Bark | 3 | 2 | 1 | AFG1 | 7.7 |
| Mulungu (*Erythrina velutina*) | Bark | 10 | 2 | 2 | ZEN | 13.6-49.0 |
| Myrcia (*Myrcia multiflora*) | Leaf | 9 - 12 | 1 | < LOD |  |  |
| Passion fruit (*Passiflora alata*) | Leaf | 3 | 1 | 1 | ZEN | 14.5 |
| Passion fruit (*Passiflora incarnata*) | Leaf and stem | 3 | 1 | 1 | ZEN | 14.5 |
| Peruvian maca (*Lepidium meyenii*) | Root | NR | 1 | < LOD |  |  |
| Senna (*Cassia acutifolia*) | Leaf | 3 - 10 | 3 | < LOD |  |  |
| Senna (*Cassia acutifolia*) | Leaf and bark | 3 - 10 | 1 | 1 | AFB2 | 465.2 |
| Senna (*Senna alexandrina*) | Leaf | 3 - 10 | 3 | < LOD |  |  |
| Senna (*Cassia angustifolia*) | Leaf | 3 - 10 | 3 | < LOD |  |  |
| Spirulina (*Spirulina plantesis*) | Algae | NR | 2 | < LOD |  |  |
| Tribulus (*Tribulus terrestris*) | Fruit dry extract | NR | 1 | 1 | FB2 | Traces |
| OTA | 2.7 |

Traces: ≥ LOD <LOQ

**Table S2.** Extraction conditions tested based on modified QuEChERS procedures.

| **Test** | **Water, mL/**  **time, min** | **ACN, mL (% formic acid)** | **Dispersion salt** | | **Clean-up volume (mL)a** | **Clean-up** |
| --- | --- | --- | --- | --- | --- | --- |
| 1 | 6.5/30 | 7.5 (1) | 3.75g MgSO4+ NaOAc (4:1) | 3 | | 0.6g MgSO4+PSA (3:1) |
| 2 | 15/15 | 15 (10) | 5g MgSO4+ NaCl (4:1) | 3 | | 0,6g MgSO4+C18 (3:1) |
| 3 | 15/15 | 15 (10) | 5g MgSO4+ NaCl (4:1) | 3 | | 0.6g MgSO4+PSA+C18 (6:1:1) |
| 4 | 15/30 | 15 (10) | 5g MgSO4+ NaCl (4:1) | 9 | | 1.26g MgSO4+PSA+CGB (3:1) |

aAliquot of the extract used for clean-up.

**Table S3.** Optimized ESI-MS/MS parameters, chromatographic retention times, ion ratios, and internal standards (IS) used for the multi-mycotoxin LC–MS/MS analysis of dry herbs.

| **Analyte** | **DP (V)** | **Transition (m/z)** | **CE (V)** | **CXP (V)** | **RT (min)** | **Ion ratio (RSD; %)** |
| --- | --- | --- | --- | --- | --- | --- |
| 15-AcDON | 106 | 339.1 → 261.1 | 15 | 14 | 6.6 | 0.6 (8.5) |
| 339.1 → 137.1 | 15 | 16 |
| 3-AcDON | 96 | 339.0 → 231.1 | 15 | 12 | 6.3 | 0.5 (14.7) |
| 339.0 → 203.0 | 21 | 12 |
| U-AFB1 (IS) | 126 | 330.1→ 301.0 | 33 | 26 | 11.0 | 0.9 (2.0) |
| 330.1 → 255.0 | 51 | 28 |
| AFB1 | 121 | 313.0 → 241.0 | 49 | 26 | 11.1 | 1.2 (4.0) |
| 313.0 → 285.0 | 31 | 14 |
| AFB2 | 136 | 315.0 → 259.0 | 39 | 22 | 10.6 | 0.5 (7.1) |
| 315.0 → 243.0 | 51 | 26 |
| U-AFG1 (IS) | 16 | 346.1 → 257.1 | 37 | 30 | 10.2 | 0.7 (2.9) |
| 346.1 → 212.0 | 55 | 24 |
| AFG1 | 101 | 329.0 → 200.0 | 53 | 22 | 10.2 | 1.5 (5.2) |
| 329.0 → 243.0 | 37 | 28 |
| AFG2 | 136 | 331.0 → 245.0 | 41 | 12 | 9.8 | 1.0 (15.2) |
| 331.0 → 189.0 | 55 | 20 |
| CTV | 71 | 403.1 → 297.1 | 21 | 16 | 16.5 | 1.0 (11.6) |
| 403.1 → 139.0 | 33 | 10 |
| d1-DON (IS) | 41 | 298.1 → 249.1 | 15 | 14 | 3.0 | 0.4 (5.1) |
| 298.1 → 203.1 | 21 | 24 |
| DON | 76 | 297.1 → 249.0 | 16 | 11 | 3.0 | 0.8 (12.2) |
| 297.1 → 203.2 | 21 | 10 |
| D3G | -45 | 503.1 → 427.1 | -26 | -23 | 3.2 | 0.4 (15.2) |
| 503.1 → 247.0 | -28 | -19 |
| U-FB1 (IS) | 36 | 756.5 → 356.2 | 55 | 20 | 15.5 | 0.9 (4.0) |
| 756.5 → 374.2 | 51 | 18 |
| FB1 | 151 | 723.2 → 352.2 | 49 | 18 | 15.45 | 0.6 (7.7) |
| 723.2 → 547.2 | 39 | 26 |
| FB2 | 141 | 706.3 → 336.3 | 49 | 18 | 18.2 | 0.5 (8.4) |
| 706.3 → 318.2 | 51 | 14 |
| FB3 | 161 | 706.3 → 336.2 | 51 | 16 | 16.9 | 0.5 (1.8) |
| 706.3 → 318.3 | 51 | 16 |
| U-OTA (IS) | 51 | 424.1 → 249.9 | 33 | 28 | 16.1 | 0.5 (3.5) |
| 424.1 → 232.0 | 49 | 26 |
| OTA | 91 | 404.0 → 239.0 | 33 | 12 | 16.1 | 0.3 (4.8) |
| 404.0 → 102.0 | 85 | 12 |
| U-ZEN (IS) | -80 | 335.1 → 185.0 | -34 | -9 | 15.7 | 4.1 (19.5) |
| 335.1 → 139.9 | -40 | -11 |
| ZEN | -130 | 317.0 → 175.2 | -32 | -15 | 15.7 | 0.8 (5.2) |
| 317.0 → 130.8 | -36 | -17 |
| α-ZEL | -130 | 319.0 → 160.0 | -40 | -17 | 15.4 | 0.8 (9.8) |
| 319.0 → 130.0 | -44 | -15 |

DP = declustering potential; CE = collision energy; CXP = collision cell exit potential; RT = retention time of the analyte in the chromatographic run; Ion ratio = qualifier/quantifier obtained through the validation experiments; RSD = relative standards deviation; IS = internal standard.


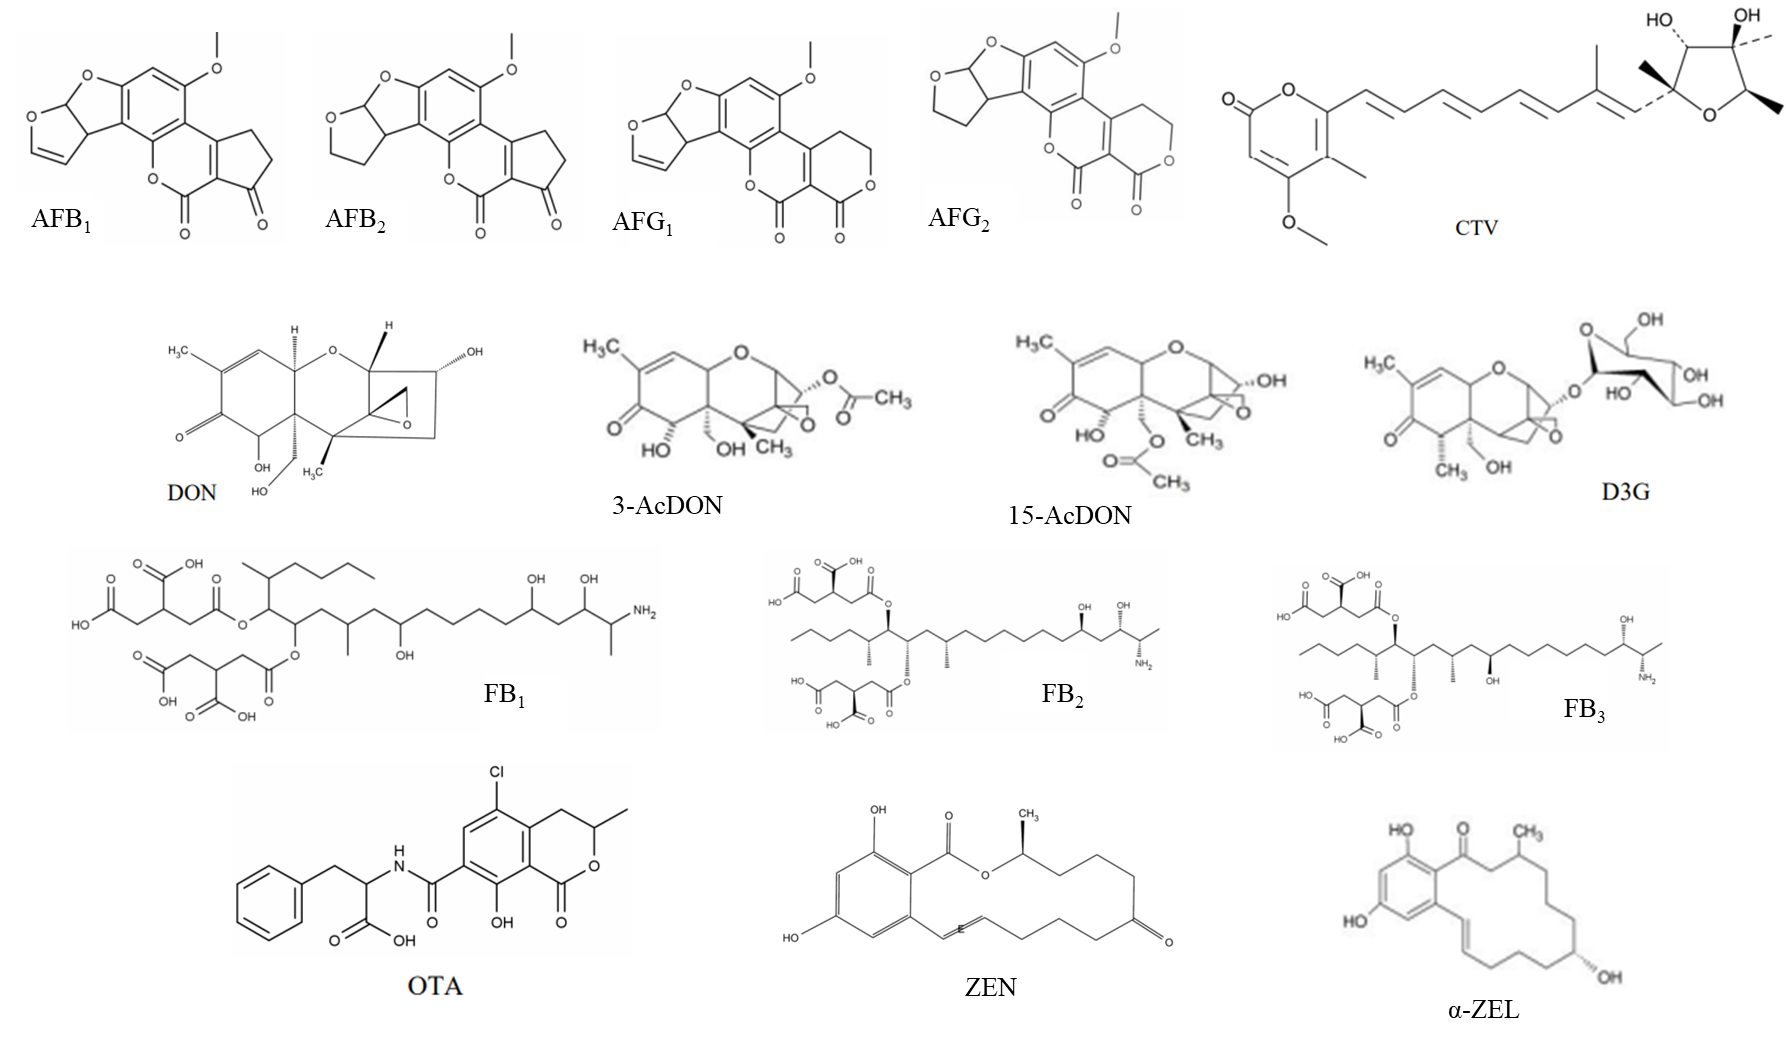


**Figure S1** – Chemical structures of mycotoxins analyzed in the present study


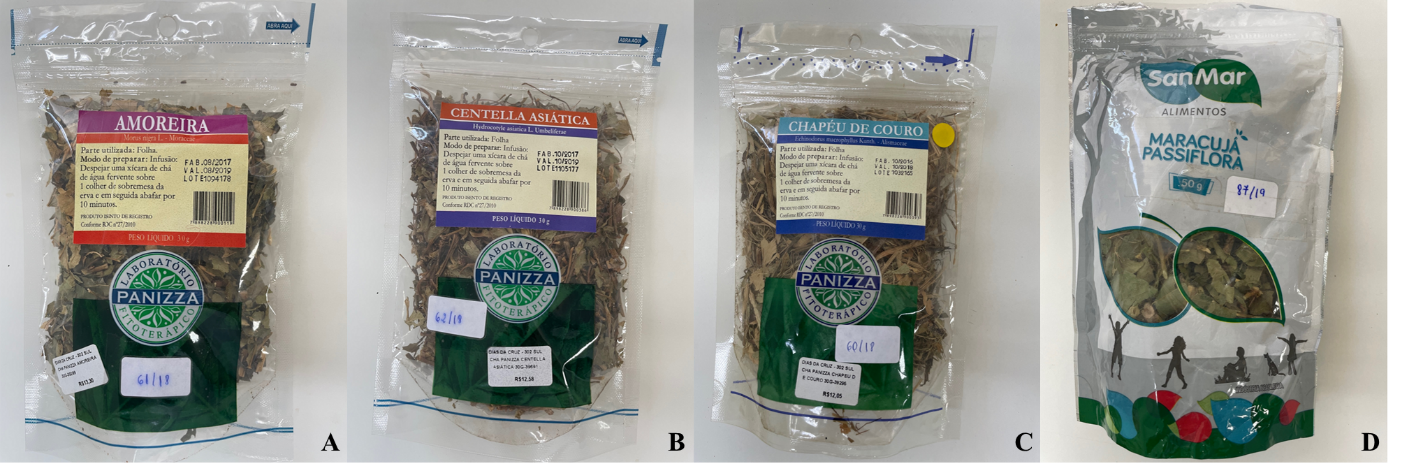
**Figure S2 –** Examples of dry herbs bulk samples purchased from retail stores and compounding pharmacies in the Federal District, Brazil. **A)** Black mulberry (*Morus nigra*) **B)** Gotu kola (*Hydrocotyle asiatica*) **C)** Chapéu de couro (*Echinodorus macrophyllus*) **D)** Passion fruit (*Passiflora alata*).


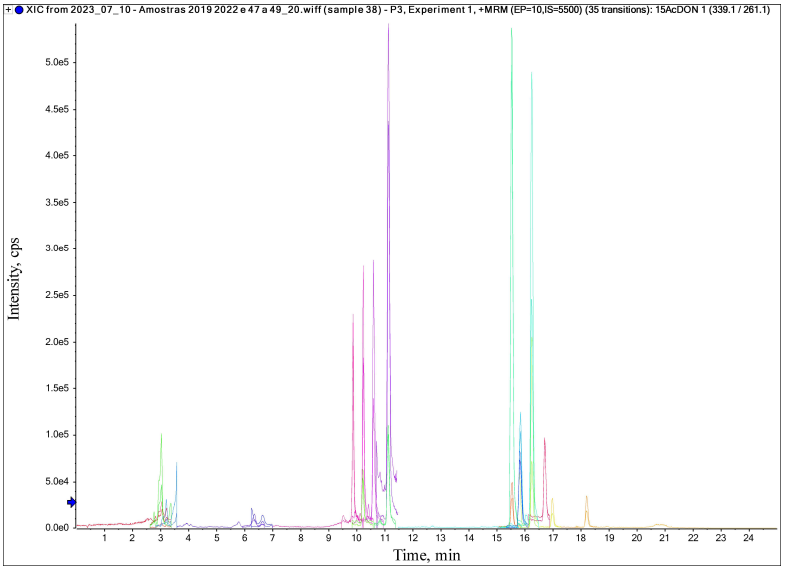


**Figure S3** - QTRAP 6500+ UHPLC/MS/MS ion chromatogram obtained from the selected reaction monitoring mode of a matrix-matched calibration sample fortified at an intermediate level (12 to 537 µg/kg).
